# Supplementary material for: Aerosol-assisted synthesis of monodisperse single-crystalline α-cristobalite nanospheres
Source: Royal Society of Chemistry journal article supplement (doi:10.1039/c1cc15713b), 2011-12-19
Supplement: c1cc15713b.pdf [file c1cc15713b.pdf]

## Aerosol-Assisted Synthesis of Monodisperse Single-Crystalline $\alpha$ -Cristobalite Nanospheres

Xingmao Jiang,<sup>a,b,c</sup> Lihong Bao,<sup>d</sup> Yung-Sung Cheng,<sup>b</sup> Darren R. Dunphy,<sup>c</sup> Xiaodong Li,<sup>d</sup> and C. Jeffrey Brinker<sup>\*c,e</sup>

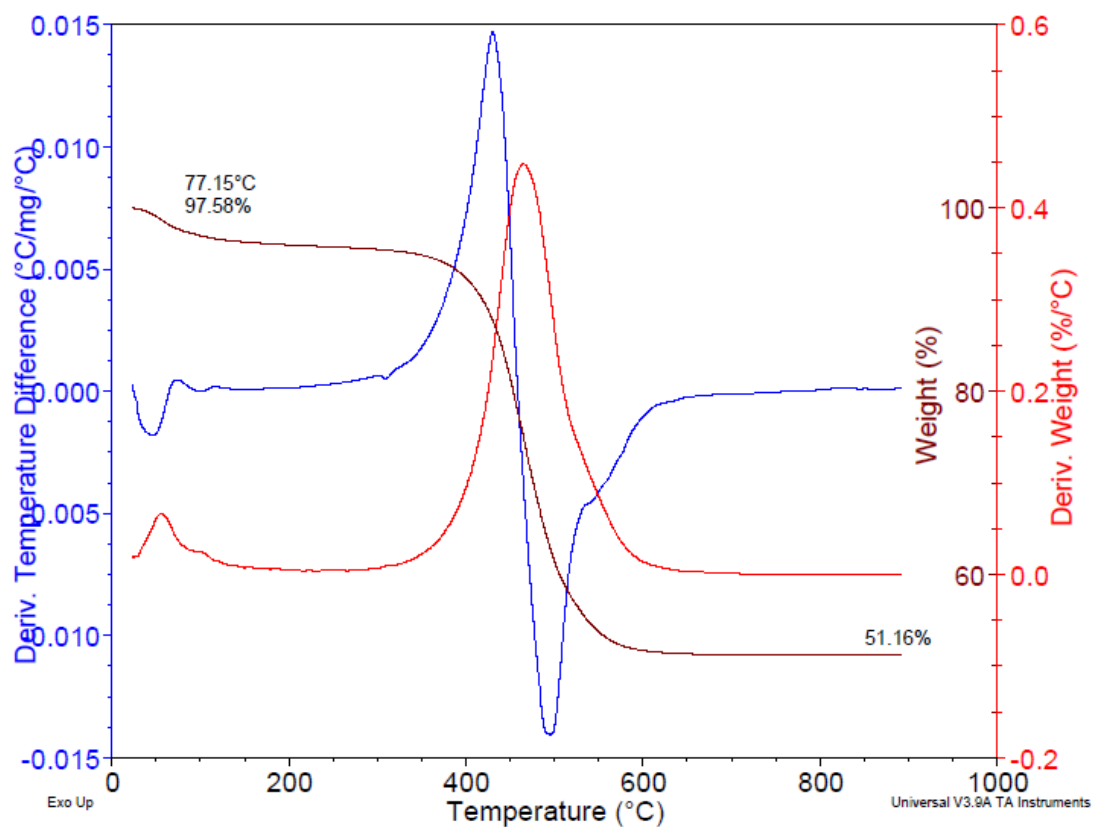

Fig. S1. TGA/DTA analysis for carbon-coated silica particles. The analysis was carried out in air with a temperature increase rate of 10°C/min.
